# Supplementary material
Source: PubMed Central journal article supplement (PMC9932943)
Supplement: jamadermatol-e226340-s001.pdf [file jamadermatol-e226340-s001.pdf]

## Supplemental Online Content

Kuzumi A, Ebata S, Fukasawa T, et al. Long-term outcomes after rituximab treatment for patients with systemic sclerosis: follow-up of the DESIRES trial with a focus on serum immunoglobulin levels. *JAMA Dermatol*. Published online February 15, 2023. doi:10.1001/jamadermatol.2022.6340

**eFigure 1.** Effect of rituximab on physiological and laboratory data in SSc.

**eFigure 2.** Longitudinal changes in serum KL-6 and IgM levels after excluding the outliers.

**eFigure 3.** Changes in clinical parameters and response to rituximab in SSc.

**eFigure 4.** Changes in clinical parameters in patients with MRSS improvement of  $> 5$  and  $\geq 25\%$  and those with MRSS improvement of  $\leq 5$  or  $< 25\%$ .

**eFigure 5.** Correlation between changes in clinical parameters and serum IgM levels after excluding the outlier.

**eFigure 6.** Changes in FVC% predicted and their correlation with serum immunoglobulin levels in patients with FVC% predicted  $< 80\%$  at baseline.

**eFigure 7.** Serum immunoglobulin levels and clinical response during the first 4 courses of rituximab.

**eFigure 8.** Baseline laboratory data and low serum immunoglobulin levels following rituximab therapy in SSc.

**eFigure 9.** Correlation baseline IgM and  $\Delta$ FVC% predicted in patients with FVC% predicted  $< 80\%$  at baseline.

**eFigure 10.** Low IgM, IgA, or IgG after the first 4 courses of rituximab.

**eTable 1.** Baseline characteristics of the patients with MRSS improvement of  $> 5$  and  $\geq 25\%$  and those with MRSS improvement of  $\leq 5$  or  $< 25\%$ .

**eTable 2.** Baseline characteristics of high responders and low responders after 4 courses of rituximab.

**eTable 3.** Adverse events.

This supplemental material has been provided by the authors to give readers additional information about their work.

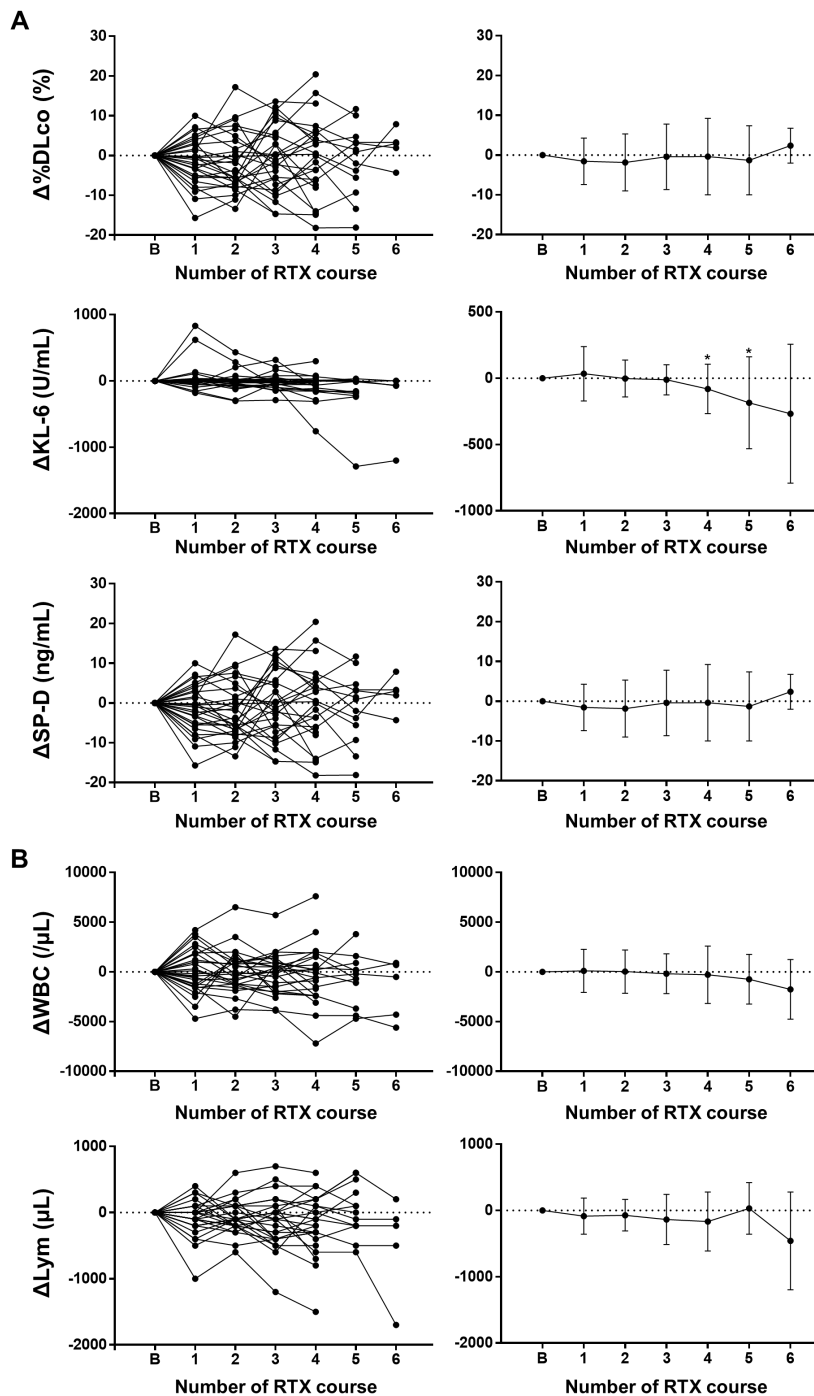

**eFigure 1. Effect of rituximab on physiological and laboratory data in SSc.**

A, Longitudinal changes in %DLco, serum KL-6 levels, and serum SP-D levels from baseline during follow-up. B, Longitudinal changes in WBC and Lym from baseline during follow-up. N = 29, 29, 29, 28, 25, 13, and 5 at baseline, and 1st, 2nd, 3rd, 4th, 5th, and 6th course of rituximab, respectively. Data are presented for each individual (left) or as mean  $\pm$  SD (right). Error bars represent SD. \* $p < 0.05$  vs. baseline. B, baseline; RTX, rituximab; %DLco, percentage of predicted diffuse diffusing capacity of the lung for carbon monoxide; KL-6, Krebs von den Lungen; SP-D, surfactant protein-D; WBC, white blood cell count; Lym, lymphocyte count.

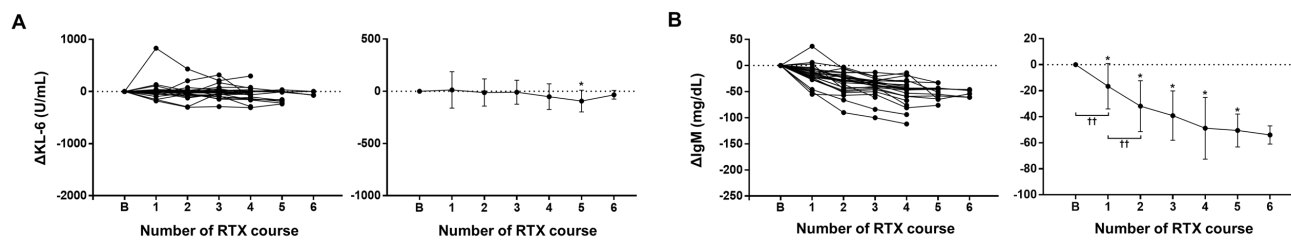

**eFigure 2. Longitudinal changes in serum KL-6 and IgM levels after excluding the outliers.**

A, Longitudinal changes in serum KL-6 levels from baseline during follow-up in patients after excluding 1 outlier with a marked decrease in KL-6. B, Longitudinal changes in serum IgM levels from baseline during follow-up in patients after excluding 1 outlier with a marked decrease in IgM. N = 28, 28, 28, 27, 24, 12, and 4 at baseline, and the 1st, 2nd, 3rd, 4th, 5th, and 6th course of rituximab, respectively. Data are presented for each individual (left) or as mean  $\pm$  SEM (right). \* $p < 0.05$  vs. baseline. †† $p < 0.01$  between two consecutive time points. B, baseline; RTX, rituximab; KL-6, Krebs von den Lungen.

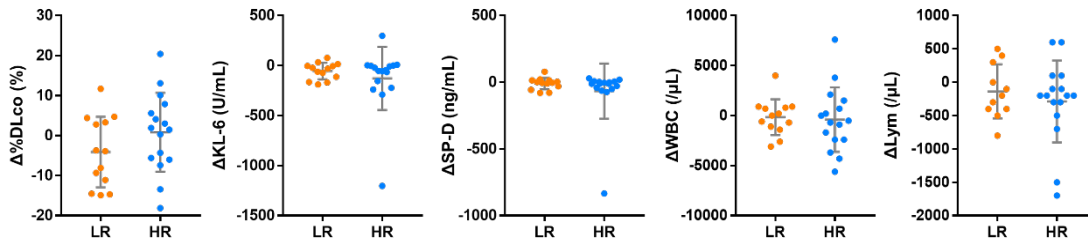

**eFigure 3. Changes in clinical parameters and response to rituximab in SSc.**

Changes in clinical parameters were compared between HR and LR during follow-up. P values = 0.23 (%DLco), 0.66 (KL-6), 0.52 (SP-D), 0.61 (WBC), 0.87 (Lym). N = 29. Data are presented as mean ± SD. Error bars represent SD. HR, high responders; LR, low responders; %DLco, percentage of predicted diffuse diffusing capacity of the lung for carbon monoxide; KL-6, Krebs von den Lungen; SP-D, surfactant protein-D; WBC, white blood cell count; Lym, lymphocyte count.

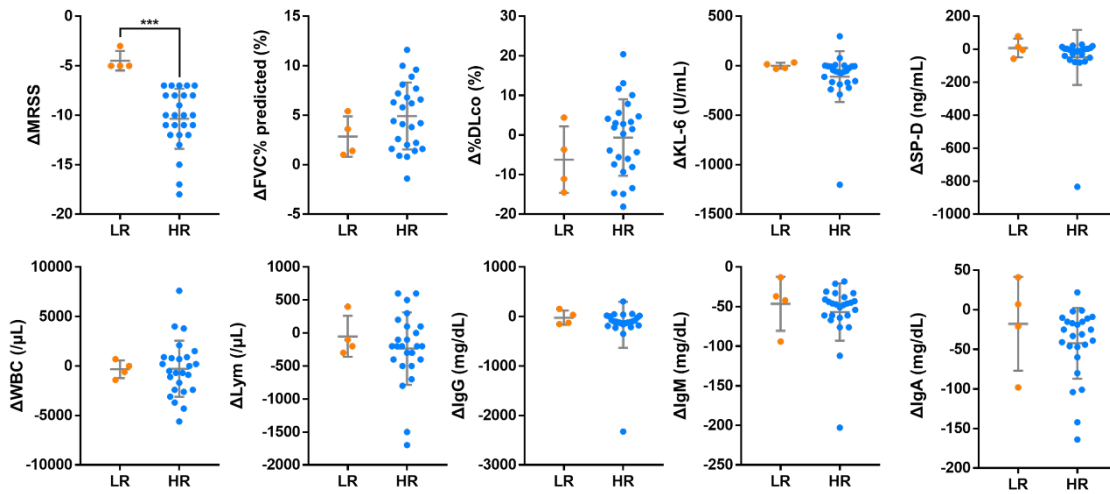

**eFigure 4. Changes in clinical parameters in patients with MRSS improvement of > 5 and ≥ 25% and those with MRSS improvement of ≤ 5 or < 25%.**

Changes in clinical parameters were compared between HR (MRSS improvement of > 5 and ≥ 25%) and LR (MRSS improvement of ≤ 5 or < 25%) during follow-up. P values = 0.000084 (MRSS), 0.18 (FVC% predicted), 0.41 (%DLco), 0.096 (KL-6), 0.38 (SP-D), 0.99 (WBC), 0.57 (Lym), 0.52 (IgG), 0.37 (IgM), 0.27 (IgA). N = 29. Data are presented as mean ± SD. Error bars represent SD. \*\*\*p<0.001. HR, high responders; LR, low responders; MRSS, modified Rodnan skin score; FVC, forced vital capacity; %DLco, percentage of predicted diffuse diffusing capacity of the lung for carbon monoxide; KL-6, Krebs von den Lungen; SP-D, surfactant protein-D; WBC, white blood cell count; Lym, lymphocyte count.

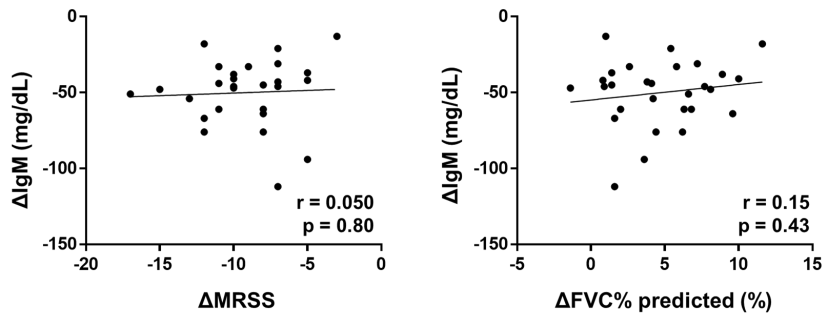

**eFigure 5. Correlation between changes in clinical parameters and serum IgM levels after excluding the outlier.**

Correlation between changes in MRSS or FVC% predicted and serum IgM levels after excluding 1 outlier with a marked decrease in serum IgM. The solid lines show the regression lines. N = 28. MRSS, modified Rodnan skin score; FVC, forced vital capacity.

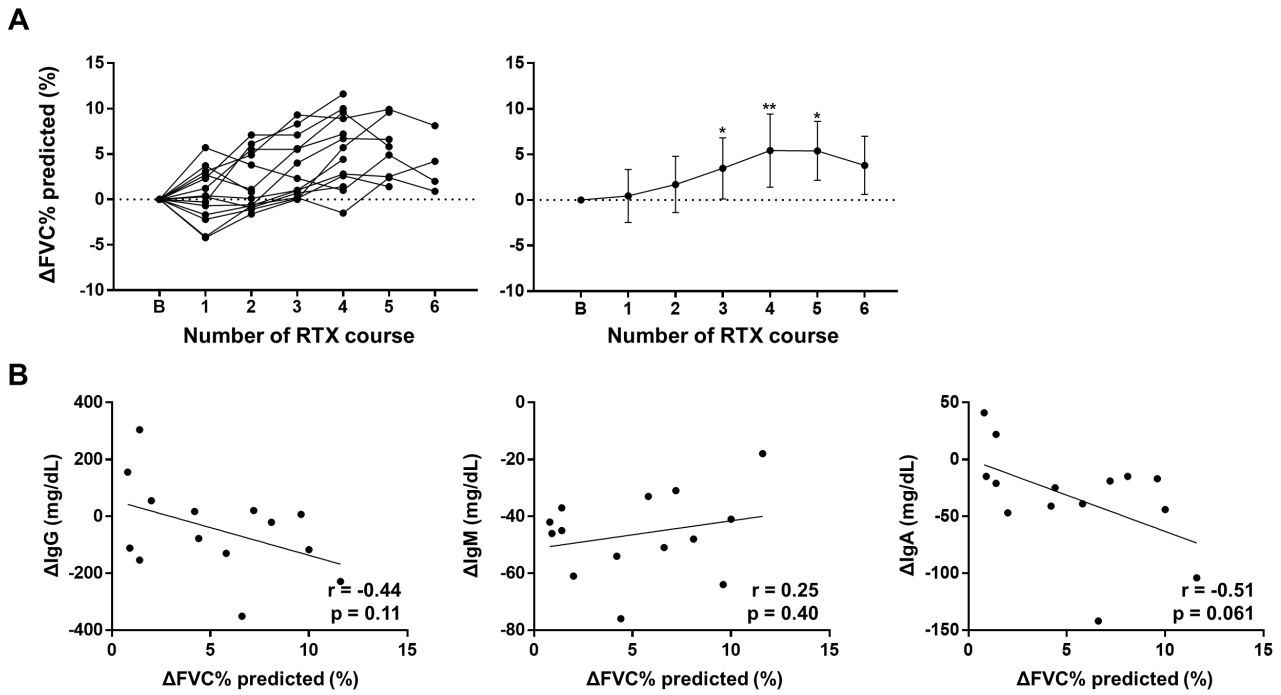

**eFigure 6. Changes in FVC% predicted and their correlation with serum immunoglobulin levels in patients with FVC% predicted < 80% at baseline.**

A, Longitudinal changes in serum FVC% predicted from baseline during follow-up in patients with FVC% predicted < 80% at baseline. N = 14, 14, 14, 13, 13, 8, and 4 at baseline, and the 1st, 2nd, 3rd, 4th, 5th, and 6th course of rituximab, respectively. Data are presented for each individual (left) or as mean  $\pm$  SEM (right). \*p<0.05 and \*\*p<0.01 vs. baseline. B, Correlation between changes in FVC% predicted and serum immunoglobulin levels. The solid lines show the regression lines. N = 14. Data are presented as mean  $\pm$  SD. B, baseline; RTX, rituximab; FVC, forced vital capacity.

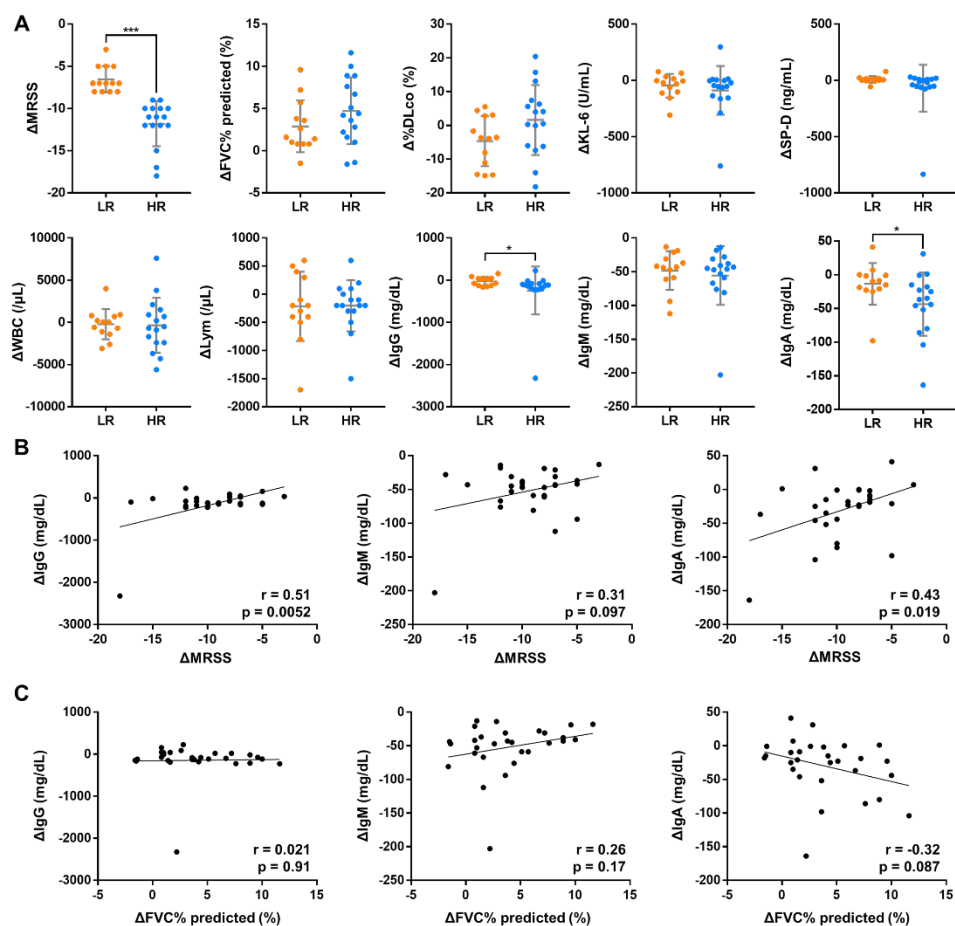

**eFigure 7. Serum immunoglobulin levels and clinical response during the first 4 courses of rituximab.**

A, Changes in clinical parameters were compared between HR and LR during the first 4 courses of rituximab. P values = 0.00000015 (MRSS), 0.13 (FVC% predicted), 0.075 (%DLco), 0.48 (KL-6), 0.10 (SP-D), 0.84 (WBC), 0.80 (Lym), 0.019 (IgG), 0.67 (IgM), 0.027 (IgA). Data are presented as mean  $\pm$  SD. Error bars represent SD. B, C, Correlation between changes in MRSS (B) or FVC% predicted (C) and serum immunoglobulin levels. The solid lines show the regression lines. \* $p < 0.05$  and \*\*\* $p < 0.001$ . HR, high responders; LR, low responders; MRSS, modified Rodnan skin score; FVC, forced vital capacity; %DLco, percentage of predicted diffuse diffusing capacity of the lung for carbon monoxide; KL-6, Krebs von den Lungen; SP-D, surfactant protein-D; WBC, white blood cell count; Lym, lymphocyte count.



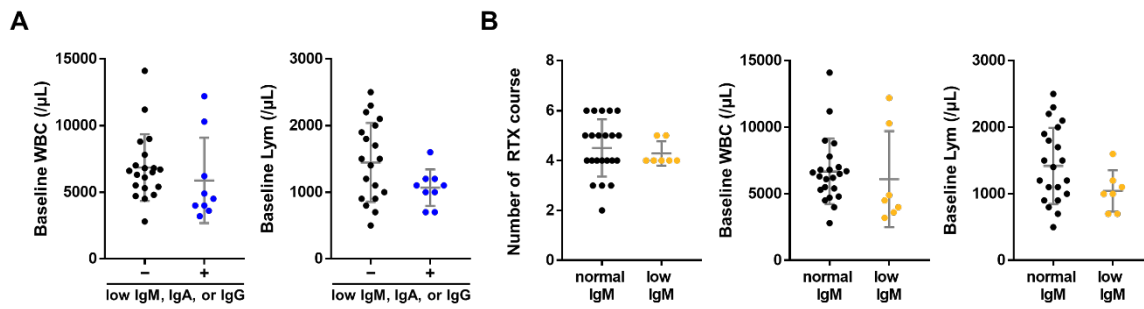

**eFigure 8. Baseline laboratory data and low serum immunoglobulin levels following rituximab therapy in SSc.**

A, Changes in baseline WBC and Lym were compared between patients with and without low IgM, IgA, or IgG at the last follow-up. B, The number of rituximab courses, baseline WBC, and baseline Lym were compared between patients with low and normal IgM at the last follow-up. N = 29. Data are presented as mean  $\pm$  SD. Error bars represent SD. RTX, rituximab; WBC, white blood cell count; Lym, lymphocyte count.

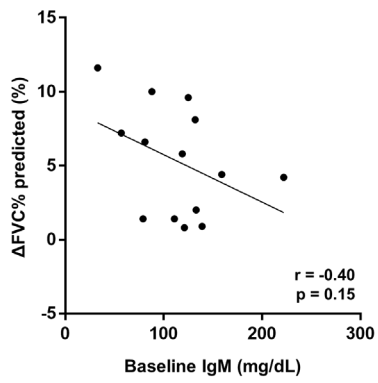

**eFigure 9. Correlation between baseline IgM levels and FVC% predicted in patients with FVC% predicted < 80% at baseline.**

Correlation between baseline IgM levels and changes in FVC% predicted during follow-up. The solid line shows the regression line. N = 14. Data are presented as mean ± SD. \*p<0.05 and \*\*\*p<0.001. FVC, forced vital capacity.

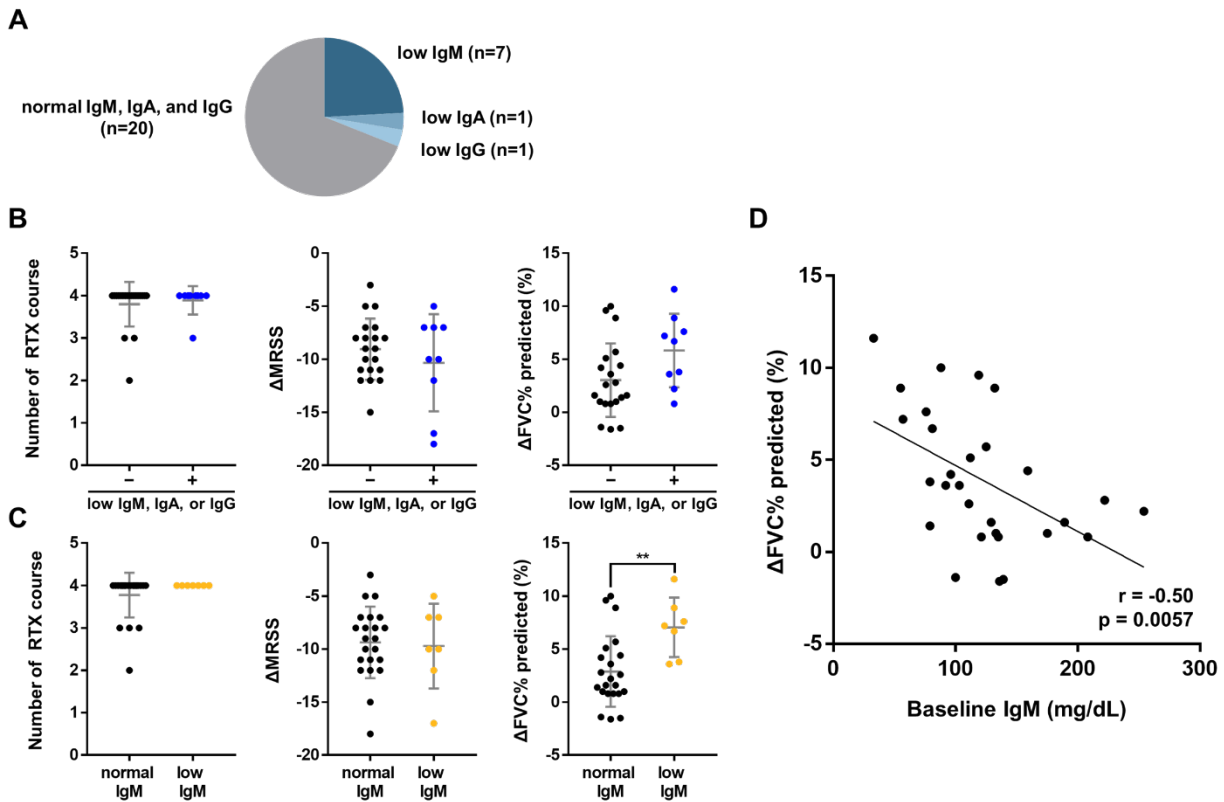

**eFigure 10. Low IgM, IgA, or IgG after the first 4 courses of rituximab.**

A, Frequencies of low serum IgM, IgA, or IgG levels in 29 SSc patients after the first 4 courses of rituximab. B, The number of rituximab courses and changes in MRSS and FVC% predicted were compared between patients with and without low IgM, IgA, or IgG after the first 4 courses of rituximab. C, The number of rituximab courses and changes in MRSS and FVC% predicted were compared between patients with low and normal IgM after the first 4 courses of rituximab. D, Correlation between baseline IgM levels and changes in FVC% predicted during the first 4 courses of rituximab. The solid line shows the regression line. N = 29. Data are presented as mean  $\pm$  SD. Error bars represent SD. \*\* $p < 0.01$ . RTX, rituximab; MRSS, modified Rodnan skin score; FVC, forced vital capacity.

**eTable 1. Baseline characteristics of the patients with MRSS improvement of > 5 and ≥ 25% and those with MRSS improvement of ≤ 5 or < 25%.**

|                                     | LR (n = 4)        | HR (n = 25)      | P values |
|-------------------------------------|-------------------|------------------|----------|
| Age (years)                         | 53 [39.3–54.8]    | 47 [35–53]       | 0.416    |
| Sex (No., women/men)                | 4/0               | 23/2             | >0.999   |
| Disease duration (months)           | 94.5 [28.3–157.8] | 52 [30–135.5]    | 0.842    |
| Disease type (No., dcSSc/lcSSc)     | 2/2               | 23/2             | >0.999   |
| Number of rituximab courses         | 3.5 [2.3–4.0]     | 5.0 [4.0–5.0]    | 0.026*   |
| Follow-up period (weeks)            | 84 [54–96]        | 120 [96–120]     | 0.026*   |
| <b>Clinical features</b>            |                   |                  |          |
| MRSS                                | 9.5 [7.5–13.8]    | 14 [11.5–16.5]   | 0.031*   |
| Pitting scars/digital ulcers        | 4 (100)           | 21 (84)          | >0.999   |
| Raynaud’s phenomenon                | 4 (100)           | 24 (96)          | >0.999   |
| Nail fold bleeding                  | 1 (25)            | 16 (64)          | 0.279    |
| Telangiectasia                      | 3 (75)            | 6 (24)           | 0.076    |
| Calcinosis                          | 0 (0)             | 1 (4)            | >0.999   |
| <b>Lungs</b>                        |                   |                  |          |
| Pulmonary fibrosis                  | 3 (75)            | 21 (84)          | 0.553    |
| FVC% predicted (%)                  | 82.5 [70.6–94.0]  | 80.1 [73.5–97.3] | >0.999   |
| %DLco (%)                           | 83.4 [68.4–98.7]  | 79.7 [69.7–97.3] | 0.981    |
| <b>Laboratory findings</b>          |                   |                  |          |
| KL-6 (U/mL)                         | 337 [200–574]     | 421 [216–624]    | 0.692    |
| SP-D (ng/mL)                        | 141 [71–193]      | 154 [79–214]     | 0.927    |
| White blood cell count (/μL)        | 6100 [4725–8300]  | 6200 [4600–7400] | 0.867    |
| Lymphocyte count (/μL)              | 1300 [1125–1475]  | 1100 [900–1850]  | 0.697    |
| CD19 <sup>+</sup> cell number (/μL) | 141 [55–330]      | 179 [121–278]    | 0.562    |
| CD20 <sup>+</sup> cell number (/μL) | 137 [47–328]      | 181 [115–258]    | 0.516    |
| IgG (mg/dL)                         | 1510 [1074–1573]  | 1257 [1150–1454] | 0.516    |
| IgM (mg/dL)                         | 112 [85–162]      | 119 [85–138]     | 0.933    |
| IgA (mg/dL)                         | 397 [170–474]     | 219 [181–271]    | 0.109    |
| Anti-topoisomerase I antibody       | 2 (50)            | 16 (64)          | 0.622    |
| Anticentromere antibody             | 1 (25)            | 3 (12)           | 0.467    |
| Anti-RNA polymerase III antibody    | 0 (0)             | 1 (4)            | >0.999   |
| <b>Concurrent medication</b>        |                   |                  |          |
| Oral prednisolone                   | 2 (50)            | 13 (52)          | >0.999   |
| Dose (mg/day)                       | 3 [0–9]           | 4 [0–7.3]        | 0.826    |

Data are presented as No. (%) or median [IQR], unless otherwise noted. \* $p < 0.05$  and \*\*\* $p < 0.001$  between HR (MRSS improvement of > 5 and ≥ 25%) and LR (MRSS improvement of ≤ 5 or < 25%). HR, high responders; LR, low responders; dcSSc, diffuse cutaneous systemic sclerosis; lcSSc, limited cutaneous systemic sclerosis; MRSS, modified Rodnan skin score; FVC, forced vital capacity; %DLco, percentage of predicted diffuse diffusing capacity of the lung for carbon monoxide; KL-6, Krebs von den Lungen; SP-D, surfactant protein-D.

**eTable 2. Baseline characteristics of high responders and low responders after 4 courses of rituximab.**

|                                     | LR (n = 13)      | HR (n = 16)      | p-value    |
|-------------------------------------|------------------|------------------|------------|
| Age (years)                         | 50 [35–54.5]     | 46.5 [35.5–53.5] | 0.657      |
| Sex (No., women/men)                | 13/0             | 14/2             | 0.488      |
| Disease duration (months)           | 77 [23–156]      | 51.5 [38.5–130]  | 0.706      |
| Disease type (No., dcSSc/lcSSc)     | 10/3             | 15/1             | 0.299      |
| Number of rituximab courses         | 4.0 [3.0–4.0]    | 4.0 [4.0–4.0]*   | 0.030*     |
| Follow-up period (weeks)            | 96 [72–96]       | 96 [96–96]*      | 0.030*     |
| Clinical features                   |                  |                  |            |
| MRSS                                | 11 [10–13.5]     | 15.5 [14–18.8]   | 0.00085*** |
| Pitting scars/digital ulcers        | 14 (88)          | 11 (85)          | >0.9999    |
| Raynaud's phenomenon                | 13 (100)         | 15 (94)          | >0.999     |
| Nail fold bleeding                  | 7 (54)           | 10 (63)          | 0.716      |
| Telangiectasia                      | 4 (31)           | 5 (31)           | >0.999     |
| Calcinosis                          | 0 (0)            | 1 (6)            | >0.999     |
| Lungs                               |                  |                  |            |
| Pulmonary fibrosis                  | 10 (77)          | 14 (88)          | 0.6322     |
| FVC% predicted (%)                  | 79.1 [71.1–97.7] | 82.9 [73.4–94.4] | 0.619      |
| %DLco (%)                           | 79.7 [69.3–93.4] | 81.2 [70.2–99.0] | 0.567      |
| Laboratory findings                 |                  |                  |            |
| KL-6 (U/mL)                         | 428 [172–659]    | 378 [251–570]    | 0.746      |
| SP-D (ng/mL)                        | 156 [91–185]     | 127 [69–237]     | 0.914      |
| White blood cell count (/μL)        | 6500 [4700–6900] | 5800 [4550–8700] | 0.738      |
| Lymphocyte count (/μL)              | 1200 [1000–1700] | 1050 [750–1850]  | 0.537      |
| CD19 <sup>+</sup> cell number (/μL) | 190 [84–367]     | 175 [124–234]    | 0.983      |
| CD20 <sup>+</sup> cell number (/μL) | 190 [79–360]     | 173 [119–226]    | 0.940      |
| IgG (mg/dL)                         | 1327 [1217–1510] | 1233 [1126–1604] | 0.4824     |
| IgM (mg/dL)                         | 121 [91–157]     | 106 [83–135]     | 0.5518     |
| IgA (mg/dL)                         | 211 [168–328]    | 225 [184–277]    | 0.7461     |
| Anti-topoisomerase I antibody       | 8 (62)           | 10 (63)          | >0.999     |
| Anticentromere antibody             | 2 (15)           | 2 (13)           | >0.999     |
| Anti-RNA polymerase III antibody    | 0 (0)            | 1 (6)            | >0.999     |
| Concurrent medication               |                  |                  |            |
| Oral prednisolone                   | 6 (46)           | 9 (56)           | 0.715      |
| Dose (mg/day)                       | 0 [0–7.5]        | 4 [0–7.4]        | 0.720      |

Data are presented as No. (%) or median [IQR], unless otherwise noted. \* $p < 0.05$  and \*\*\* $p < 0.001$  between HR and LR. HR, high responders; LR, low responders; dcSSc, diffuse cutaneous systemic sclerosis; lcSSc, limited cutaneous systemic sclerosis; MRSS, modified Rodnan skin score; FVC, forced vital capacity; %DLco, percentage of predicted diffuse diffusing capacity of the lung for carbon monoxide; KL-6, Krebs von den Lungen; SP-D, surfactant protein-D.

**eTable 3. Adverse events**

|                                 | No. of patients |
|---------------------------------|-----------------|
| Any adverse event               | 27              |
| Upper respiratory infection     | 18              |
| Dermatitis                      | 5               |
| Skin ulceration                 | 4               |
| Stomatitis                      | 3               |
| Gastroesophageal reflux disease | 3               |
| Enterocolitis                   | 3               |
| Diarrhea                        | 3               |
| Any serious adverse event       | 1               |

Some patients had more than one adverse event. Common adverse events that occurred in more than 10% of the cohort are shown.
