# Supplementary material
Source: PubMed Central journal article supplement (PMC9932943)
Supplement: jamadermatol-e226340-s002.pdf [file jamadermatol-e226340-s002.pdf]

## Data Sharing Statement

Kuzumi. Long-Term Outcomes After Rituximab Treatment for Patients With Systemic Sclerosis. *JAMA Dermatol*. Published February 15, 2023.  
doi:10.1001/jamadermatol.2022.6340

### Data

**Data available:** No
